# Supplementary material
Source: Research Square preprint supplement (doi:10.21203/rs.3.rs-9042636/v1)
Supplement: Supplementary file 1 [file da3a43a1b9c06d698d49d09d.pdf]

**A**

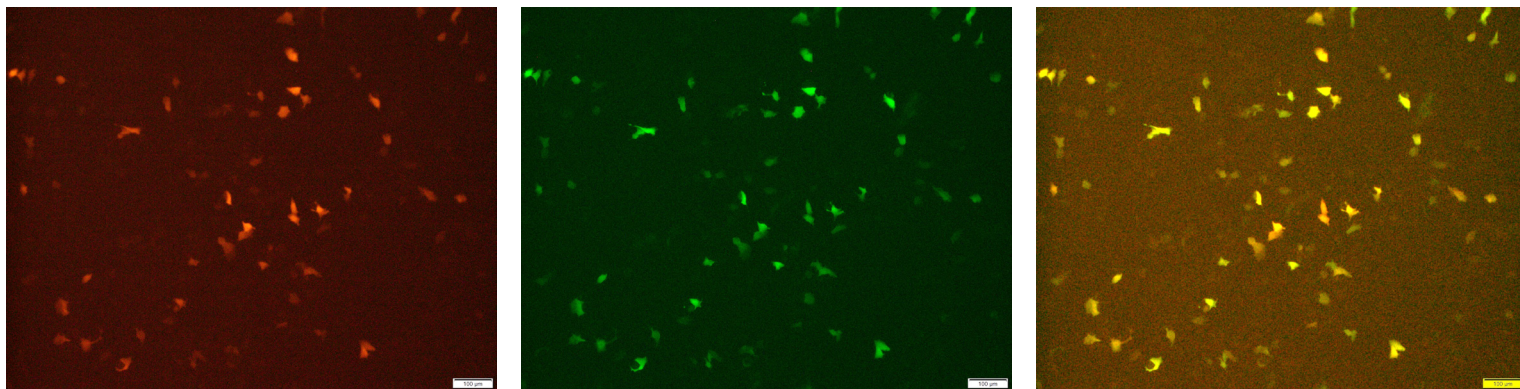

**B**

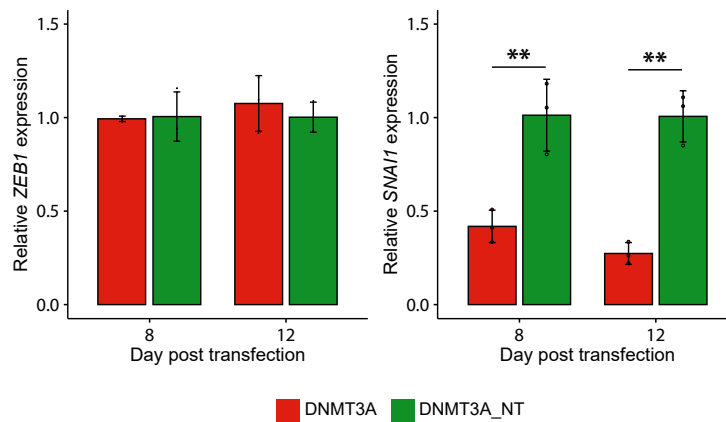

**Supplementary Figure 1. Double transfection efficiency in the HepG2 cell line and the influence of *SNAI1* gene transcription change on *ZEB1* transcription. (A)** Efficiency of double transfection in HepG2 cells with DNMT3A and G9a. The mRuby3 fluorescent marker was used for DNMT3A-dCas9, while mClover3 was used for G9a-dCas9 construct. Approximately 85% of the cells were co-transfected with both fusion constructs. **(B)** Analysis of *SNAI1* and *ZEB1* transcriptional activity on days 8 and 12 following epigenetic editing of *SNAI1* with DNMT3A-dCas9 revealed a significant decrease in *SNAI1* transcription, whereas *ZEB1* transcription remained unchanged. ImageJ was used for fluorescence image analysis and quantification of double-transfected cells. Error bars represent  $\pm$  SD (n = 3). Statistical significance for gene expression analysis was determined using a *t*-test, \*\*P < 0.01.

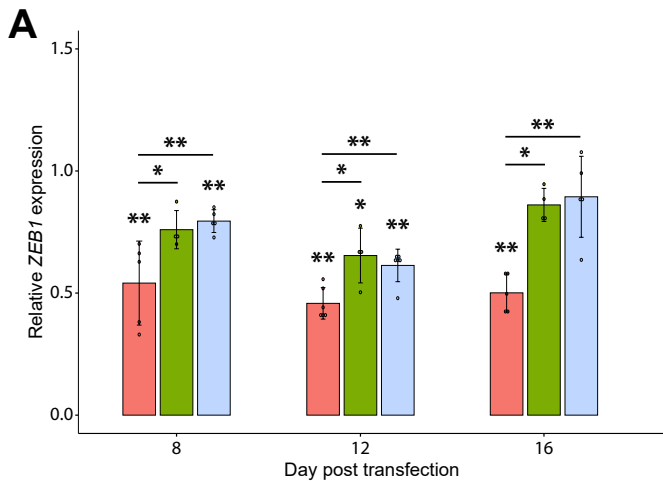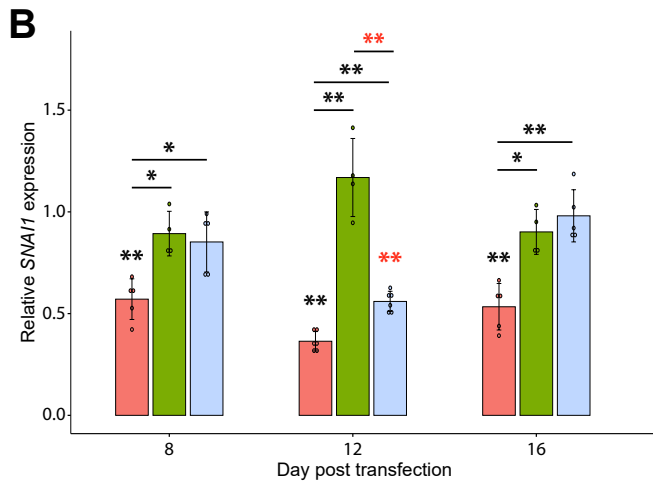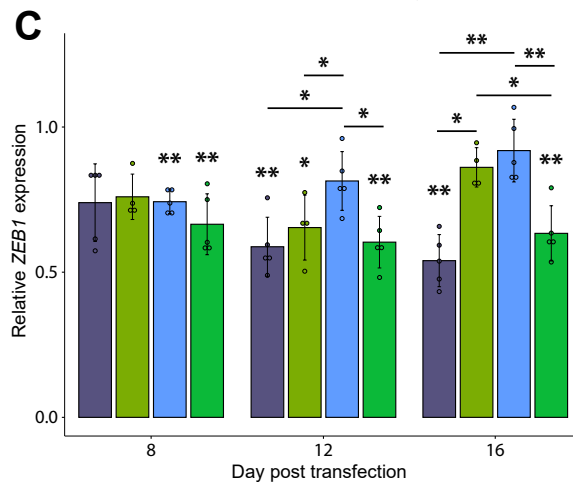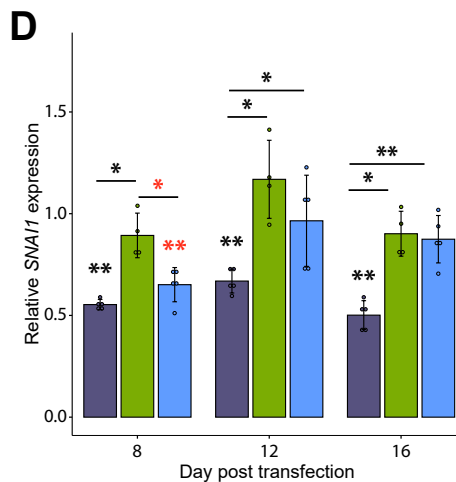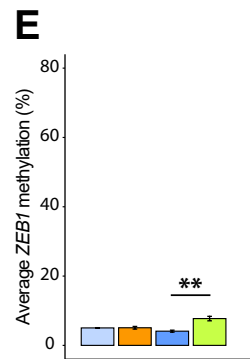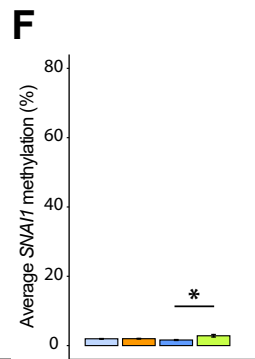

■ DNMT3A + G9a 
 ■ DNMT3A + G9a-me3 
 ■ DNMT3A + G9a-IN 
 ■ G9a 
 ■ G9a-me3 
 ■ DNMT3A\_NT + G9a\_NT 
 ■ DNMT3A\_NT + G9a-me3\_NT 
 ■ DNMT3A-IN + G9a-IN

**Supplementary Figure 2. Changes in *ZEB1* and *SNAI1* transcription and promoter DNA methylation following epigenetic targeting with DNMT3A and G9a/G9a-me3.** Combined targeting with DNMT3A and G9a significantly reduced **(A)** *ZEB1* and **(B)** *SNAI1* transcription from day 8 post-transfection compared with the catalytically inactive CRISPR interference control. G9a alone repressed *SNAI1* transcription on day 12. In contrast, DNMT3A and G9a-me3 significantly reduced **(C)** *ZEB1* transcription on day 16, coincident with loss of CRISPR interference, while **(D)** *SNAI1* transcription was reduced from day 8. G9a-me3 alone selectively repressed *SNAI1* transcription on day 8. Average DNA methylation levels at the *ZEB1* **(E)** and *SNAI1* **(F)** CpG islands following transfection with G9a or G9a-me3 alone did not show a *de novo* increase in DNA methylation. Error bars represent  $\pm$  SD (n = 3-5), the Mann-Whitney U test was used for gene expression analysis, while the *t*-test was used for DNA methylation analysis, \*P < 0.05, \*\*P < 0.01. Asterisks above bars indicate comparisons with the non-targeting (NT) control, whereas asterisks in line plots indicate comparisons between DNMT3A + G9a-me3 and DNMT3A + G9a\_IN. Red asterisks highlight the effect of G9a or G9a-me3 alone on gene transcription and the synergistic effect of the DNMT3A and G9a-me3 combination on DNA methylation level.

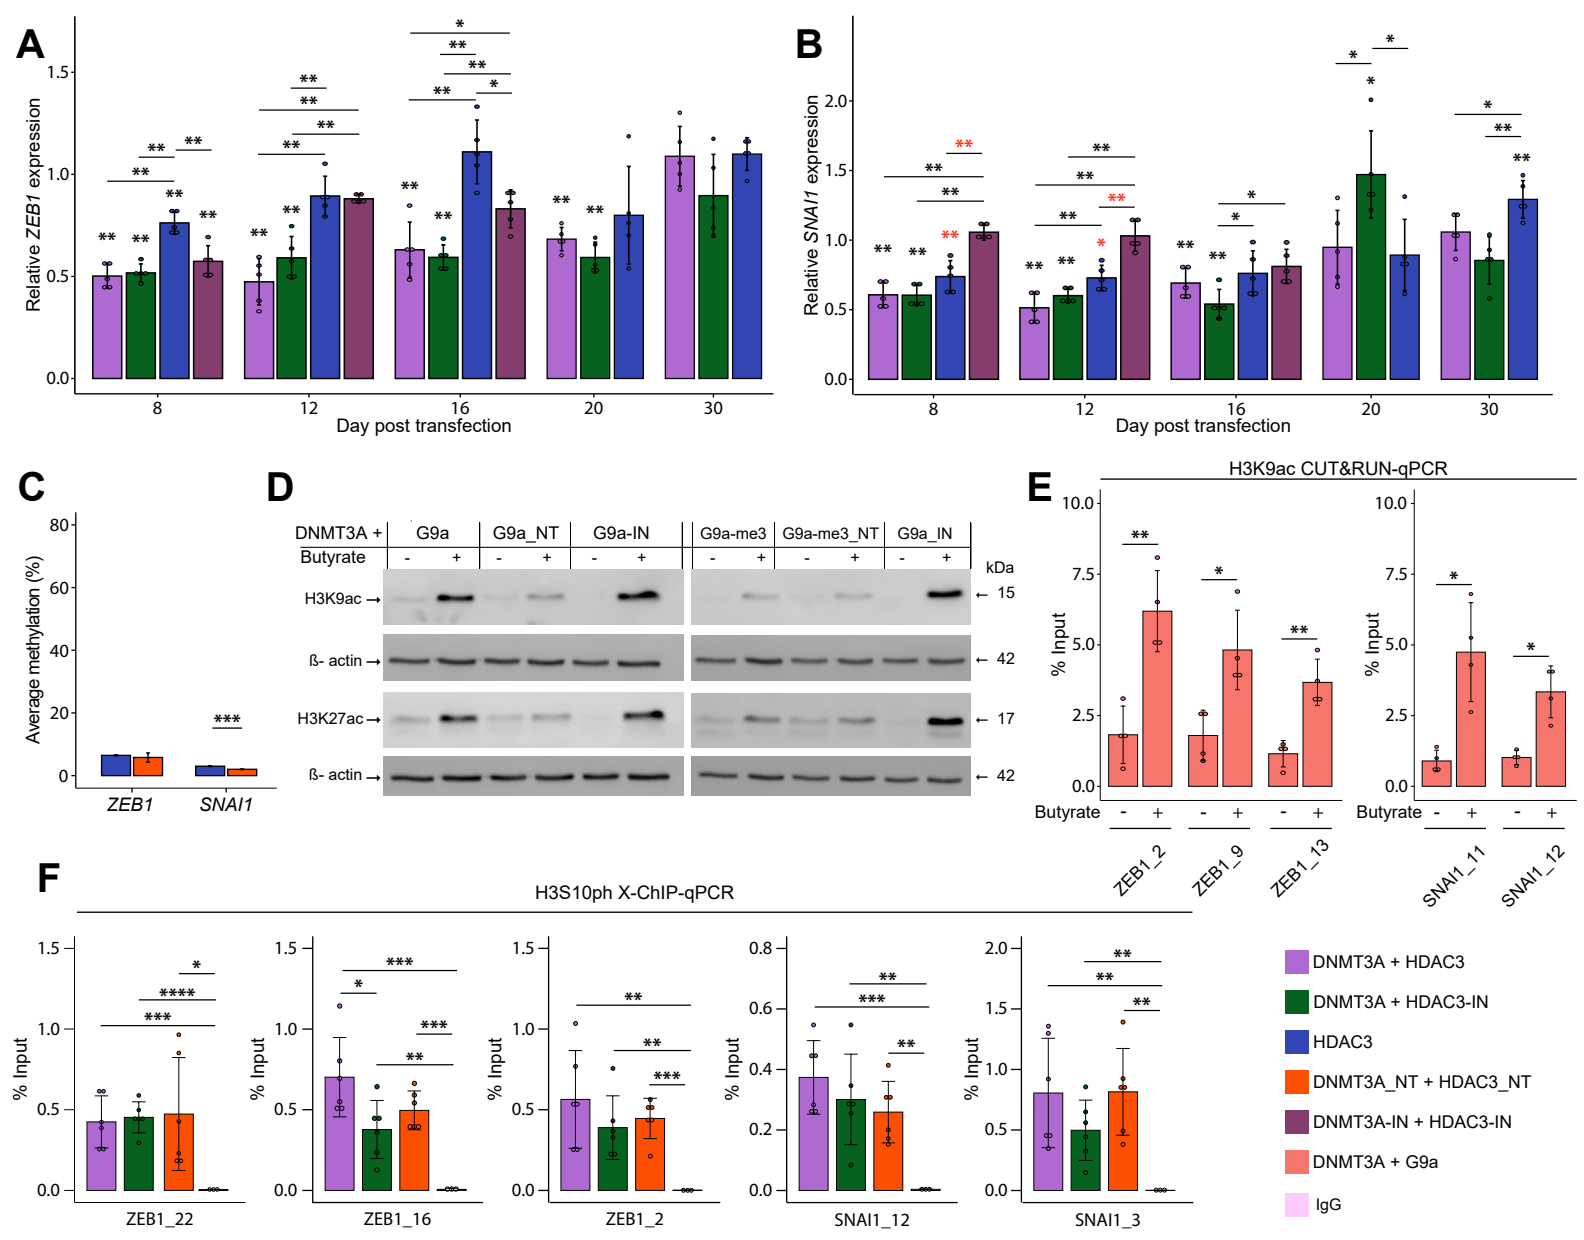

**Supplement Figure 3. Effects of acetylation on gene expression, DNA methylation, and histone modifications.** Co-transfection with DNMT3A and HDAC3 showed no synergistic effect on **(A)** *ZEB1* or **(B)** *SNAI1* transcription, while HDAC3 alone repressed *SNAI1* on days 8 and 12. Further, HDAC3 alone did not induce *de novo* DNA methylation **(C)** at *ZEB1* or *SNAI1* CpG islands. **(D)** Butyrate treatment increased global H3K9ac and H3K27ac levels, as shown by western blot in co-transfections with DNMT3A+G9a/G9a-me3. **(E)** Butyrate increased H3K9ac at multiple regions within *ZEB1* and *SNAI1* CpG islands in DNMT3A and G9a co-transfections, as shown by CUT&RUN-qPCR. **(F)** DNMT3A and HDAC3 co-transfection did not alter H3S10 phosphorylation at either locus. Error bars are  $\pm$  SD (n = 3-5), statistical significance was assessed using the Mann-Whitney U test for gene expression analysis, while the *t*-test was used for DNA methylation, X-ChIP-qPCR, and CUT&RUN-qPCR analysis, \*P < 0.05, \*\*P < 0.01, \*\*\*P < 0.001, \*\*\*\*P < 0.0001. Asterisks above bars indicate comparisons with NT control, and a red asterisk denote effect of HDAC3 alone on gene transcription.

**A**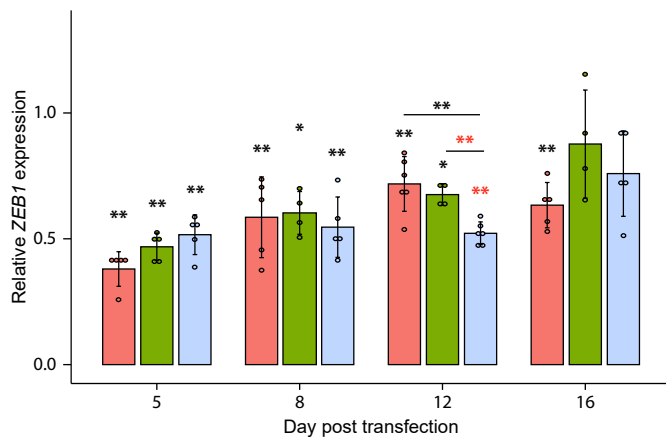**B**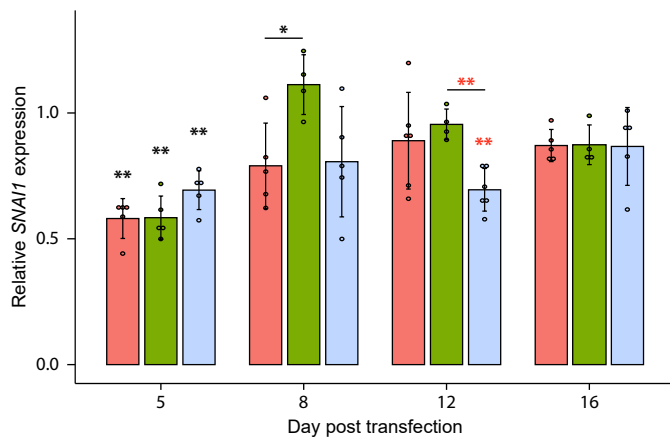**C**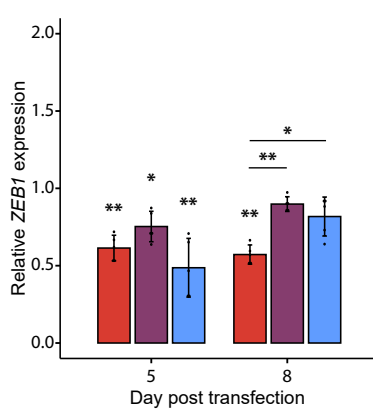**D**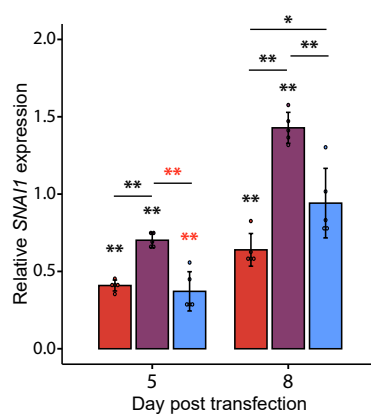**E**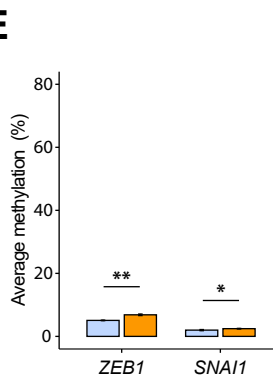**F**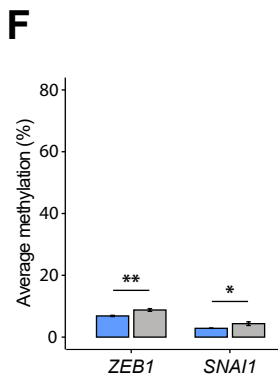**G**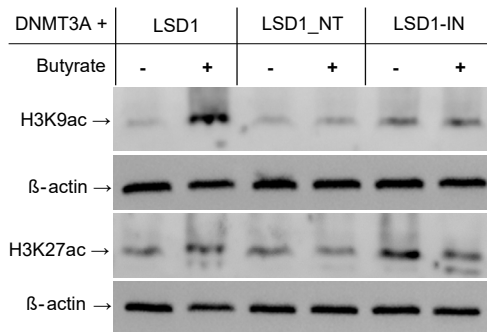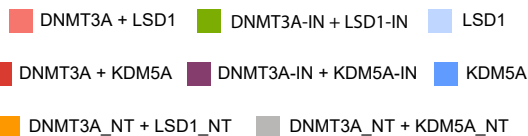

**Supplementary Figure 4. Regulation of *ZEB1* and *SNAI1* transcription following DNMT3A co-targeting with LSD1 or KDM5A.** Co-targeting of DNMT3A and LSD1 at **(A)** *ZEB1* or **(B)** *SNAI1* did not further reduce transcription compared with the catalytically inactive CRISPR interference control. LSD1 alone reduced *ZEB1* and *SNAI1* transcription on day 12. Co-targeting of DNMT3A and KDM5A significantly reduced **(C)** *ZEB1* transcription on day 8 and **(D)** *SNAI1* transcription on days 5 and 8 relative to the CRISPR interference control. KDM5A alone selectively reduced *SNAI1* transcription on day 5. **(E)** LSD1 or **(F)** KDM5A alone did not induce *de novo* DNA methylation at the *ZEB1* or *SNAI1* CpG islands. **(G)** Western blot analysis showed increased global H3K9ac and H3K27ac following DNMT3A and LSD1 co-transfection along with butyrate treatment. Error bars are  $\pm$  SD (n = 3-5), the Mann-Whitney U test was used for gene expression analysis, while the *t*-test was used for DNA methylation analysis, \*P < 0.05, \*\*P < 0.01. Asterisks above each bar indicate comparisons with the NT control. Red asterisks denote effects of LSD1 or KDM5A alone on *ZEB1* and *SNAI1* gene transcription.

## SUPPLEMENTARY MATERIAL

### SUPPLEMENTARY METHODS

#### Upgrade of the modular CRISPR/dCas9 toolbox with the new multi-guide cassette

The *ZEB1* and *SNAI1* gene loci were targeted simultaneously with 9 different gRNAs at the same time (*ZEB1* with 6 gRNAs and *SNAI1* with 3 gRNAs). For that purpose, the multi-guide system from Josipović et al. (2019)<sup>1</sup> was upgraded to receive more than six different gRNA molecules at the same time. Five different gRNAs for *ZEB1* were cloned into each pSgM<sub>x</sub>G plasmid for SpCas9 gRNA molecules ( $x = 1, 2, 3, 4, \text{ and } 5$ ). Next, Esp3I assembly of plasmids for cloning of individual gRNA molecules into the final BsaI assembled constructs was done as described in Josipović et al. (2019)<sup>1</sup>. For the last position with ends “IV-Z”, Multi-guide\_IV-Z annealed oligonucleotide (Supplementary Table S1) was used, containing two BsaI restriction sites, leaving “B-A” sticky ends. Since each pSg-x1-6 empty plasmid also contains two BsaI restriction sites leaving “B-A” compatible ends, the remaining 3 gRNAs for *SNAI1* and last gRNA for *ZEB1* gene locus were assembled in pSg-x4 and then cloned with BsaI in final construct. The resulting plasmid then contained 9 different gRNA molecules along with dCas9 fusion.

**SUPPLEMENTARY TABLES**

**Supplementary Table S1. Sequences of primers and custom oligonucleotides used for molecular cloning**

| Primer/custom oligonucleotide | Sequence (5'→3')                                                                                                                                                                                                                                                                                                                                                                                                                                                                                                                                                                                                                                                                                                                                                                                                                                                                                                                                                                                                                                                                                                                                                                                                                                                                                                                                                                                                                                                                                                                                                                                        | Use                                                 |
|-------------------------------|---------------------------------------------------------------------------------------------------------------------------------------------------------------------------------------------------------------------------------------------------------------------------------------------------------------------------------------------------------------------------------------------------------------------------------------------------------------------------------------------------------------------------------------------------------------------------------------------------------------------------------------------------------------------------------------------------------------------------------------------------------------------------------------------------------------------------------------------------------------------------------------------------------------------------------------------------------------------------------------------------------------------------------------------------------------------------------------------------------------------------------------------------------------------------------------------------------------------------------------------------------------------------------------------------------------------------------------------------------------------------------------------------------------------------------------------------------------------------------------------------------------------------------------------------------------------------------------------------------|-----------------------------------------------------|
| <b>Gblock-G9a-SET_S</b>       | CATGAACCCCGACAACAGCGACGAAGACA<br>AGCTTGGTCTCTCCATGGTGCCTAAGAAGA<br>AAAGAAAAGTTGGTGGCGGATCCGCAGCC<br>ATAGCTGAAGTTCTGCTGAACGCTAGATGT<br>GACCTGCACGCAGTCAATTATCACGGCGA<br>CACTCCACTGCATATTGCCGCAAGAGAAAG<br>TTACCACGACTGCGTGCTGCTGTTCCCTGAG<br>CCGCGGCGCAAACCCTGAGCTGAGAAACA<br>AGGAGGGCGATAACCGCCTGGGACCTCACC<br>CCTGAGCGCTCTGATGTTTGGTTCGCTCTC<br>CAACTGAACCGGAAACTCAGGCTGGGGGT<br>CGGCAACAGGGCTATCAGGACCGAAAAGA<br>TCATCTGTCGGGATGTGGCAAGAGGCTAT<br>GAAAATGTCCCTATACCCTGTGTTAATGGT<br>GTGGATGGCGAGCCATGCCCTGAAGATTA<br>CAAGTATATCAGCGAGAACTGCGAGACTTC<br>TACCATGAACATAGACAGAAACATTACACA<br>CCTCCAGCATTGTA CTGCGTCGATGATTG<br>CTCAAGCTCAAATTGCCTCTGCGGGCAACT<br>CAGCATTGCTGTTGGTATGATAAGGATGG<br>AAGGCTGCTCCAGGAGTTTAATAAGATAGA<br>ACCACCTCTCATATTTGAGTGTAATCAGGC<br>TTGTAGCTGCTGGAGAACTGCAAGAATAG<br>AGTGGTTCAAAGCGGAATCAAAGTCAGGC<br>TGCAACTCTACAGGACCGCTAAGATGGGA<br>TGGGGTGTGAGAGCCCTCCAGACCATTCC<br>ACAAGGCACTTTTCATATGCGAATATGTCGG<br>AGAGCTGATCAGCGATGCAGAAGCAGACG<br>TTCGGGAGGACGATAGCTACCTGTTTCGAC<br>CTGGACAACAAAGATGGGGAAGTCTATTGT<br>ATAGACGCAAGATACTATGGCAACATCTCC<br>CGGTTCCATTAACCATCTGTGTGACCCAAAC<br>ATCATCCCTGTGAGAGTGTTTCATGCTGCAT<br>CAGGATCTGAGGTTCCCTAGGATCGCATTCC<br>TTCAGCTCCCGCGATATACGCACAGGCGA<br>GAACTCGGCTTTGACTACGGAGATCGGT<br>TTTGGGACATAAAGTCTAAGTACTTTACCT<br>GTCAGTGCGGTAGCGAAAAATGCAAACATT<br>CTGCTGAGGCAATAGCTCTCGAACAATCAA<br>GACTGGCTCGGCTCGATCCACACCCTGAA<br>CTCCTGCCTGAACTCGGCAGCCTGCCTCC<br>CGTGAACCTCCGGAGTGAGACCCTCGAGGT<br>CTTCCCTAAGGGATGCGGAAGGTCAGGATG<br>GATCCATGTCACGCAGGAAGCAGAGCAAT<br>CCTAGGCAAATCAAGCGGTCCCTCGGCGA<br>TATGGAGGCTCGGGAGGAAGTCCAGCTCG | Custom-synthesized gene fragment for G9a-SET domain |

|                                     |                                                                                                                                                                                                                                                                                                                                                                                                                                                                                                                                                                                                                                                                                                                                                                                                                                                                                                                                                                                                                                                                                                                                                                                                                                                                                                                                                                                                                                                                                                                                                                                  |  |
|-------------------------------------|----------------------------------------------------------------------------------------------------------------------------------------------------------------------------------------------------------------------------------------------------------------------------------------------------------------------------------------------------------------------------------------------------------------------------------------------------------------------------------------------------------------------------------------------------------------------------------------------------------------------------------------------------------------------------------------------------------------------------------------------------------------------------------------------------------------------------------------------------------------------------------------------------------------------------------------------------------------------------------------------------------------------------------------------------------------------------------------------------------------------------------------------------------------------------------------------------------------------------------------------------------------------------------------------------------------------------------------------------------------------------------------------------------------------------------------------------------------------------------------------------------------------------------------------------------------------------------|--|
|                                     | <p>TCGGTGCTTCTCACATGGAACAAAAGGCAA<br/> CAGCACCCGAGGCCCCAGTCCCGGCGG<br/> AGGGTCCATGAGCCGCAGGAAGCAGAGTA<br/> ACCCTCGCCAAATAAAGCGCAGTCTCGGG<br/> GATATGGAGGCTCGCGAGGAAGTGCAACT<br/> GGTTGGAGCATCCCACATGGAGCAGAAAG<br/> CTACAGCCCCCGAGGCACCCTCTCCATCC<br/> GGATAACCTGGGCTTTCTGGATGTCCAGG<br/> ATCCTAATAGAACGCATGAGAAAGCCCC<br/> GGAAGATCACCTTCCGGGGGCTTTTTTATT<br/> GCGCGTCGGCCGCGGACACCAGCTTGGA<br/> CTTCTA</p>                                                                                                                                                                                                                                                                                                                                                                                                                                                                                                                                                                                                                                                                                                                                                                                                                                                                                                                                                                                                                                                                                                                                                                     |  |
| <p><b>Gblock-G9a-<br/>SET_A</b></p> | <p>TAGAAGTCCAAGCTGGTGTCCGCGGCCGA<br/> CGCGCAATAAAAAAGCCCCGGAAGGTGA<br/> TCTTCCGGGGGCTTTCTCATGCGTTCTATT<br/> AGGATCCTGGACATCCAGAAAGCCCAGGT<br/> TATCCGGATGGAGAGGGTGCCTCGGGGG<br/> CTGTAGCTTTCTGCTCCATGTGGGATGCTC<br/> CAACCAGTTGCACTTCTCGCGAGCCTCC<br/> ATATCCCCGAGACTGCGCTTTATTTGGCGA<br/> GGGTTACTCTGCTTCCTGCGGCTCATGGA<br/> CCCTCCGCCGGGACTGGGGGCCTCGGGT<br/> GCTGTTGCCTTTTGTTCATGTGAGAAGCA<br/> CCGACGAGCTGGACTTCTCCCGAGCCTC<br/> CATATCGCCGAGGGACCGCTTGATTTGCC<br/> TAGGATTGCTCTGCTTCTGCGTGACATGG<br/> ATCCATCCTGACCTTCCGCATCCCTTAGGA<br/> AGACCTCGAGGGTCTCACTCCGGAGTTCA<br/> CGGGAGGCAGGCTGCCGAGTTCAGGCAG<br/> GAGTTCAGGGTGTGGATCGAGCCGAGCCA<br/> GTCTTGATTGTTTCGAGAGCTATTGCCTCAG<br/> CAGAATGTTTGCATTTTTCGCTACCGCACT<br/> GACAGGTAAGTACTTAGACTTTATGTCCC<br/> AAAACCGATCTCCGTAGTCAAAGCCGAGTT<br/> CCTCGCCTGTGCGTATATCGCGGGAGCTG<br/> AAGAATGCGATCCTAGGGAACCTCAGATC<br/> CTGATGCAGCATGAACACTCTCACAGGGAT<br/> GATGTTTGGGTACACAGATGGTTAATGAA<br/> CCGGGAGATGTTGCCATAGTATCTTGCCTC<br/> TATAAATAGACTTCCCCATCTTTGTTGTCC<br/> AGGTCGAACAGGTAGCTATCGTCCTCCCG<br/> AACGTCTGCTTCTGCATCGCTGATCAGCTC<br/> TCCGACATATTCGCATATGAAAGTGCCTTG<br/> TGAATGGTCTGGAGGGCTCTCACACCCC<br/> ATCCCATCTTAGCGGTCTGTAGAGTTGCA<br/> GCCTGACTTTGATTCCGCTTTGAACCACTC<br/> TATTCTTGCACTTCTCCAGCAGCTACAAG<br/> CCTGATTACACTCAAATATGAGAGGTGGTT<br/> CTATCTTATTAACCTCCTGGAGCAGCCTTC<br/> CATCCTTATCATACCAACAGCGAATGCTGA<br/> GTTGCCCGCAGAGGCAATTTGAGCTTGAG<br/> CAATCATCGACGCAAGTACAATGCTGGAG<br/> GTGTGTAATGTTTCTGTCTATGTTTATGGTA<br/> GAAGTCTCGCAGTTCTCGCTGATATACTTG<br/> TAATCTTCAGGGCATGGCTCGCCATCCACA</p> |  |

|                         |                                                                                                                                                                                                                                                                                                                                                                                                                                                                                   |                                                       |
|-------------------------|-----------------------------------------------------------------------------------------------------------------------------------------------------------------------------------------------------------------------------------------------------------------------------------------------------------------------------------------------------------------------------------------------------------------------------------------------------------------------------------|-------------------------------------------------------|
|                         | CCATTAACACAGGGTATAGGGACATTTTCA<br>TAGCCTCTTGCCACATCCCGACAGATGATC<br>TTTTCGGTCCTGATAGCCCTGTTGCCGACC<br>CCCAGCCTGAGTTTCCGGTTCAGTTGGAG<br>AGCGAACCAAACATCAGAGCGCTCAGGGG<br>TGAGGTCCCAGGCGGTATCGCCCTCCTTG<br>TTTCTCAGCTCAGGGTTTGCGCCGCGGCT<br>CAGGAACAGCAGCACGCAGTCGTGGTAAC<br>TTTCTCTTGCGGCAATATGCAGTGGAGTGT<br>CGCCGTGATAATTGACTGCGTGCAGGTCA<br>CATCTAGCGTTCAGCAGAACTTCAGCTATG<br>GCTGCGGATCCGCCACCAACTTTTCTTTTC<br>TTCTTAGGCACCATGGAGAGACCAAGCTTG<br>TCTTCGTCGCTGTTGTGCGGGGTTTCATG |                                                       |
| <b>G9a_Y1067F_S</b>     | ACAAGGCACTTTTCATATGCGAATTTGTCCG<br>AGAGCT                                                                                                                                                                                                                                                                                                                                                                                                                                         | Mutation Y1067F<br>for the construction<br>of G9a_me3 |
| <b>G9a_Y1067F_A</b>     | AGCTCTCCGACAAATTCGCATATGAAAGTG<br>CCTTGT                                                                                                                                                                                                                                                                                                                                                                                                                                          |                                                       |
| <b>G9a_Y1154F_S</b>     | GAGGAACTCGGCTTTGACTTCGGAGATCG<br>G                                                                                                                                                                                                                                                                                                                                                                                                                                                | Construction of<br>catalytically<br>inactive G9a      |
| <b>G9a_Y1154F_A</b>     | CCGATCTCCGAAGTCAAAGCCGAGTTCCT<br>C                                                                                                                                                                                                                                                                                                                                                                                                                                                |                                                       |
| <b>HDAC3_Fw</b>         | TTCGTCTCTGGAGGAGGATCTATGGCCAA<br>GACCGTCGCCTATTTCTACG                                                                                                                                                                                                                                                                                                                                                                                                                             | PCR amplification<br>of HDAC3                         |
| <b>HDAC3_Rev</b>        | TTCGTCTCTCGAAAATCTCCACATCGCTTT<br>CCTTGTC                                                                                                                                                                                                                                                                                                                                                                                                                                         |                                                       |
| <b>HDAC3_noBsal_S</b>   | ATTACGGTCTGTATAAGAAGATGATCGTCT<br>TC                                                                                                                                                                                                                                                                                                                                                                                                                                              | Bsal restriction site<br>I mutagenesis in<br>HDAC3    |
| <b>HDAC3_noBsal_A</b>   | GCAGGACCAGGCTATGGG                                                                                                                                                                                                                                                                                                                                                                                                                                                                |                                                       |
| <b>HDAC3_Fw</b>         | TTCGTCTCTGGAGGAGGATCTATGGCCAA<br>GACCGTCGCCTATTTCTACG                                                                                                                                                                                                                                                                                                                                                                                                                             | Bsal restriction site<br>II mutagenesis in<br>HDAC3   |
| <b>HDAC3_noBsal_Rev</b> | TTCGTCTCTCGAAAATCTCCACATCGCTTT<br>CCTTGTCATTGTCATGATCTCCATC                                                                                                                                                                                                                                                                                                                                                                                                                       |                                                       |
| <b>HDAC3_R265P_S</b>    | CTGTGATCCATTGGGCTGCTTTAACCTCAG<br>C                                                                                                                                                                                                                                                                                                                                                                                                                                               | Construction of<br>catalytically<br>inactive HDAC3    |
| <b>HDAC3_R265P_A</b>    | GCTGAGGTTAAAGCAGCCCAATGGATCAC<br>AG                                                                                                                                                                                                                                                                                                                                                                                                                                               |                                                       |
| <b>KDM5A_Fw</b>         | TACGTCTCTGGAGGAGGATCTATGGCGGG<br>CGTGGGGC                                                                                                                                                                                                                                                                                                                                                                                                                                         | PCR amplification<br>of KDM5A (1-797)                 |
| <b>KDM5A_Rev</b>        | TACGTCTCACGAATCCGGACACAGATGCA<br>CATGTCTCAGCTTCTTTTACAGC                                                                                                                                                                                                                                                                                                                                                                                                                          |                                                       |
| <b>KDM5A_noBsal_S</b>   | CAGGAAAAGGAACTGGGTCCCTTTTGAAGT<br>CACATTATGA                                                                                                                                                                                                                                                                                                                                                                                                                                      | Bsal restriction site<br>mutagenesis in<br>KDM5A      |
| <b>KDM5A_noBsal_A</b>   | TCATAATGTGACTTCAAAGGGACCCAGTT<br>CCTTTTCTG                                                                                                                                                                                                                                                                                                                                                                                                                                        |                                                       |
| <b>KDM5A_H483A_S</b>    | CTTCTCTTCTTTTGGCTGGGCCATTGAGGA<br>TCACTGGAGT                                                                                                                                                                                                                                                                                                                                                                                                                                      | Construction of<br>catalytically<br>inactive KDM5A    |
| <b>KDM5A_H483A_A</b>    | ACTCCAGTGATCCTCAATGGCCCAGCAAAA<br>AGAAGAGAAG                                                                                                                                                                                                                                                                                                                                                                                                                                      |                                                       |
| <b>RIOX1_Fw</b>         | AAGAAGACTTGGAGGAGGATCTATGGATG<br>GGCTCCAGGCC                                                                                                                                                                                                                                                                                                                                                                                                                                      | PCR amplification<br>of RIOX1                         |
| <b>RIOX1_Rev</b>        | TTGAAGACTTTCGAAATTTAGGGCTAGAGGC<br>ATCTTAGTG                                                                                                                                                                                                                                                                                                                                                                                                                                      |                                                       |

|                    |                                                     |                                               |
|--------------------|-----------------------------------------------------|-----------------------------------------------|
| RIOX1_noBsal_1_S   | CGGTCCGGGTGGTGGAAACCTCGGCC                          | Bsal restriction site I mutagenesis in RIOX1  |
| RIOX1_noBsal_1_A   | GGCCGAGGTTTCCACCACCCGGACCG                          |                                               |
| RIOX1_noBsal_2_S   | CAACGGACGACGCGAAACCCTGAACCC                         | Bsal restriction site II mutagenesis in RIOX1 |
| RIOX1_noBsal_2_A   | GGTTTCAGGGTTTCGCGTCGTCCGTTG                         |                                               |
| RIOX1_noEsp3I_S    | CTCCCTGCGTCTGCTCTGTCCGCAG                           | Esp3I restriction site mutagenesis in RIOX1   |
| RIOX1_noEsp3I_A    | CTGCGGACAGAGCAGACGCAGGGAG                           |                                               |
| RIOX1_H339A_S      | AGGGCTTTGCCCCCGCCTACGACGACATC<br>G                  | Construction of catalytically inactive RIOX1  |
| RIOX1_H339A_A      | CGATGTCGTCGTAGGCGGGGGCAAAGCCC<br>T                  |                                               |
| RIOX1_H404A_S      | CTGTATTTTCTCGGGGCTTCATTGCCCAA<br>GCTGAATGC          |                                               |
| RIOX1_H404A_A      | GCATTCAGCTTGGGCAATGAAGCCCCGAG<br>GAAAATACAG         |                                               |
| LSD1_Fw            | TACGTCTCTGGAGCCATGGTCTTATCTGGG<br>AAGAAGGCGGCAG     | PCR amplification of LSD1                     |
| LSD1_Rev           | TACGTCTCTCGAATCCGGACATGCTTGGG<br>GACTGCTGTGC        |                                               |
| LSD1_noBsal_S      | TATAGGCTCTGGGGTGTGTCAGGCTTGGCAG                     | Bsal restriction site mutagenesis in LSD1     |
| LSD1_noBsal_A      | CTGCCAAGCCTGACACCCCAGAGCCTATA                       |                                               |
| LSD1_K661A_S       | ATGGGATTTGGCAACCTTAACGCCGTGGT<br>GTTGTGTTTTGATCGG   | Construction of catalytically inactive LSD1   |
| LSD1_K661A_A       | CCGATCAAAACACAACACCACGGCGTTAA<br>GGTTGCCAAATCCCAT   |                                               |
| Multi-guide_IV-Z_S | CGCTTGACAGAGACCGATTGTGCGACCTG<br>ATTGCCCGGTCTCAGGTA | Multi-guide_IV-Z oligonucleotide              |
| Multi-guide_IV-Z_A | ACCTTACCTGAGACCGGGCAATCAGGTGC<br>GACAATCGGTCTCTGTCA |                                               |

**Supplementary Table S2. Sequences of gRNA molecules**

| gRNA molecule | Target site sequence (5'→3') including PAM (underlined) |
|---------------|---------------------------------------------------------|
| ZEB1_gRNA01   | CACTCACCGTTATTGCGCCGCGG                                 |
| ZEB1_gRNA02   | TACACGTACATTTCCGACCGAGG                                 |
| ZEB1_gRNA03   | TCGGCGCCGGCTAACGGTCCAGG                                 |
| ZEB1_gRNA04   | CGGCCGGCGGGCGGTAAAGTTGGG                                |
| ZEB1_gRNA05   | AGGTACCCACTTAACGCCGCCGG                                 |
| ZEB1_gRNA06   | TAGCAGCCCCGCGCGTCCGTCCG                                 |
| SNAI1_gRNA01  | GCATTCATTGCGCCGCGGCACGG                                 |
| SNAI1_gRNA02  | CTTCGCTCGACGTCCCGCCCCGG                                 |
| SNAI1_gRNA03  | ACACCGCACGTGGCTCTCGGCGG                                 |
| NT-gRNA       | GTAGGCGCGCCGCTCTCTAC                                    |

**Supplementary Table S3. Sequences of pyrosequencing assays used for methylation analysis**

| Assay name | Assay sequence 5'→3' (analysed CpG sites are bold and underlined)                                                                                               |
|------------|-----------------------------------------------------------------------------------------------------------------------------------------------------------------|
| ZEB1_A1    | G <u><b>CGCCG</b></u> GGATGGGCG <u><b>GTGTGCGTGC</b></u> CCT <u><b>CGCG</b></u> CT                                                                              |
| ZEB1_A2    | <u><b>CCGGACGCACG</b></u> GAG <u><b>CG</b></u> CTGAAG <u><b>CCG</b></u> GATAATGGGGCTTGGATGG <u><b>CG</b></u>                                                    |
| ZEB1_A3    | G <u><b>CGCGCG</b></u> TGTG <u><b>CGCG</b></u> GG <u><b>CGCCG</b></u> GCTGTG <u><b>CGCGCCGCG</b></u> GG <u><b>CG</b></u> GACAGG<br>GTT <u><b>CGGCCGCGCG</b></u> |
| ZEB1_A4    | <u><b>CGCCG</b></u> CTGCC <u><b>CG</b></u> GAG <u><b>CCGCGCCGCG</b></u> GCC <u><b>CG</b></u> CT <u><b>CG</b></u>                                                |
| ZEB1_A5    | <u><b>CGCG</b></u> GAGGCAGGAC <u><b>CGCCG</b></u> CGAG                                                                                                          |
| SNA1_A1    | <u><b>CCGGGCG</b></u> CTGAG <u><b>CCG</b></u> GTGGG <u><b>CGCGCGGCG</b></u> TCCTG <u><b>CCG</b></u>                                                             |
| SNA1_A2    | <u><b>CGCCACGCGGCGCG</b></u> AGCC <u><b>CG</b></u> GCCAGCAGC <u><b>CGGCG</b></u> CACCTGCT <u><b>CG</b></u>                                                      |
| SNA1_A3    | <u><b>CGCGAATCGGCG</b></u> ACCCAGTGCCT <u><b>CG</b></u> ACCACTATGC <u><b>CGCG</b></u>                                                                           |

**Supplementary Table S4. Sequences of PCR and pyrosequencing primers**

| Primer             | Sequence (5'→3')                 | Use                                               |
|--------------------|----------------------------------|---------------------------------------------------|
| ZEB1_Pyro_Fw       | TTGGGTTTAGAGATYGGGAAGTATTATAGA   | PCR amplification of ZEB1_A1 and ZEB1_A2 fragment |
| ZEB1_Pyro_Rev_Btn  | [Btn]CCCTTAACACAACAACACAAATCAATA |                                                   |
| ZEB1_Pyro_Seq1     | GGTAGAYGAGGTTTTT                 | Pyrosequencing of ZEB1_A1                         |
| ZEB1_Pyro_Seq2     | GGGAAGTTGTTATTTGGG               | Pyrosequencing of ZEB1_A2                         |
| ZEB1_Pyro_Fw3      | GTTGYGTGGGGTTTGT                 | PCR amplification of the ZEB1_A3 fragment         |
| ZEB1_Pyro_Rev3_Btn | [Btn]ACCCRCRAATCCCAACTTTACC      |                                                   |
| ZEB1_Pyro_seq3     | GTTGYGTGGGGTTTGT                 | Pyrosequencing of ZEB1_A3                         |
| ZEB1_Pyro_Fw4      | GTGGAGTGGGAAAGTAGAAAGTAGTG       | PCR amplification of the ZEB1_A4 fragment         |
| ZEB1_Pyro_Rev4     | [Btn]CTCCACCCRAAACCAAAAAATAACC   |                                                   |
| ZEB1_Pyro_Seq4     | GTAGTGTTTTTTGTTTTTTTTTYGTTGT     | Pyrosequencing of ZEB1_A4                         |
| ZEB1_Pyro_Fw5      | GYGGYGGGTGTGGTTAG                | PCR amplification of ZEB1_A5 fragment             |
| ZEB1_Pyro_Rev5     | [Btn]CATCACCTTCCTTACACCTAAAACTC  |                                                   |
| ZEB1_Pyro_Fw5      | GYGGYGGGTGTGGTTAG                | Pyrosequencing of ZEB1_A5                         |
| SNA1_Pyro_Fw1      | GGAGGAAATTTTTGTTTTTTTTTAAGTT     | PCR amplification of                              |
| SNA1_Pyro_Rev1_Btn | [Btn]AAACCTCTACRAAATAAAACCCC     |                                                   |

|                     |                           |                                            |
|---------------------|---------------------------|--------------------------------------------|
|                     |                           | the SNAI1_A1 fragment                      |
| SNAI1_Pyro_Seq1     | GTTAGAAGYGTTTAGATTA       | Pyrosequencing of SNAI1_A1                 |
| SNAI1_Pyro_Fw2      | GTTYGGATAGTTTTAGTAT       | PCR amplification of the SNAI1_A2 fragment |
| SNAI1_Pyro_Rev2_Btn | [Btn]CCACRCCCCTTTATCACCTC |                                            |
| SNAI1_Pyro_seq2     | GAGGAGTTTTYGTTYGGGTTTTTAT | Pyrosequencing of SNAI1_A2                 |
| SNAI1_Pyro_Fw3      | GGAGTATTTAAGGGAGTTGG      | PCR amplification of the SNAI1_A3 fragment |
| SNAI1_Pyro_Rev3_Btn | [Btn]CTAAAACCCAAAACCCCTC  |                                            |
| SNAI1_Pyro_seq3     | GTTTTTTTGYGTTATTGTTG      | Pyrosequencing of SNAI1_A3                 |

**Supplementary Table S5. Sequences of ChIP-qPCR primers**

| Primer           | Sequence (5'→3')      | ChIP-qPCR assay |
|------------------|-----------------------|-----------------|
| ZEB1_ChIP_Fw2    | GTGCCAAGGGAAACACACAC  | ZEB1_2          |
| ZEB1_ChIP_Rev2   | GCAACCACCACCACATGTTC  |                 |
| ZEB1_ChIP_Fw4    | CTTTTCCCTCGCCCCTCAAT  | ZEB1_4          |
| ZEB1_ChIP_Rev4   | AACCTTGTTGCTAGGGACCG  |                 |
| ZEB1_ChIP_Fw9    | CGCGCTTTTCTCTTTTCGGT  | ZEB1_9          |
| ZEB1_ChIP_Rev9   | CATCCAAGCCCCATTATCCG  |                 |
| ZEB1_ChIP_Fw13   | TTTCTGGTTATCTCGGGGCG  | ZEB1_13         |
| ZEB1_ChIP_Rev13  | CTCTCGCCACAGGAACTGTC  |                 |
| ZEB1_ChIP_Fw16   | CGCTCGCTCTCCCTGAAC    | ZEB1_16         |
| ZEB1_ChIP_Rev16  | TAGGCGGAGAGAGACCAGG   |                 |
| ZEB1_ChIP_Fw20   | ATCTGTCAGCCGATGCTTCT  | ZEB1_20         |
| ZEB1_ChIP_Rev20  | GCTAAGGTATCCACAGGCCAT |                 |
| ZEB1_ChIP_Fw22   | GGAAGTGAGACAAGCACCGT  | ZEB1_22         |
| ZEB1_ChIP_Rev22  | GCTAGAAGTTCCGCTTGCCA  |                 |
| SNAI1_ChIP_Fw3   | GGTTCTTCTGCGCTACTGCT  | SNAI1_3         |
| SNAI1_ChIP_Rev3  | GAGGAAAGAGCGCGGCATAG  |                 |
| SNAI1_ChIP_Fw5   | CCAGTGCCTCGACCACTATG  | SNAI1_5         |
| SNAI1_ChIP_Rev5  | CCTCCAACGCACCTGGATTA  |                 |
| SNAI1_ChIP_Fw11  | TCCCTGGAAGCTGCTCTCT   | SNAI1_11        |
| SNAI1_ChIP_Rev11 | ATCAAGGGAAAAGGCCCGAG  |                 |
| SNAI1_ChIP_Fw12  | GTGCTCTTGGCTAGCTGGG   | SNAI1_12        |
| SNAI1_ChIP_Rev12 | AAATGCCACGGCCTTTTTGCS |                 |

**Supplementary Table S6. List of locus-specific proteins associated with the *SNAI1* (S) or *ZEB1* (Z) CpG islands that are enriched by immunoprecipitation of dCas9 fusion proteins following S or Z transfections with DNMT3A-dCas9 and G9a-dCas9.** Proteins were identified by mass spectrometry, with protein accession numbers, protein and gene names, and normalized mass spectrometry intensities provided. Fold changes in protein abundance between the *ZEB1* and *SNAI1* loci are reported. In addition, ratios comparing protein intensities in the MOCK negative control with the lowest detected intensities in samples transfected with dCas9 fusion constructs are included.

| Accession  | Protein Name                                                                 | Gene Name        | Fold Change (S/Z)  | Normalized Intensity (S) | Normalized Intensity (Z) | Ratio (MOC K/ Sample) |
|------------|------------------------------------------------------------------------------|------------------|--------------------|--------------------------|--------------------------|-----------------------|
| Q71UI9     | Histone H2A.V                                                                | <i>H2AZ2</i>     | Only detected in S | 38497.81328              | 0                        | 0.323                 |
| V9HWN7     | Fructose-bisphosphate aldolase                                               | <i>HEL-S-87p</i> | Only detected in S | 15406.0607               | 0                        | Not in MOCK           |
| P62906     | 60S ribosomal protein L10a                                                   | <i>RPL10A</i>    | 3.824              | 310360.0335              | 81159.36942              | Not in MOCK           |
| J3KRX5     | 60S ribosomal protein L17 (Fragment)                                         | <i>RPL17</i>     | 3.053              | 416777.8782              | 136508.5452              | 0.154                 |
| P39019     | 40S ribosomal protein S19                                                    | <i>RPS19</i>     | 2.738              | 951537.5204              | 347509.4806              | Not in MOCK           |
| I3L303     | 40S ribosomal protein S15a                                                   | <i>RPS15A</i>    | 1.820              | 123037.0825              | 67605.9726               | Not in MOCK           |
| A8MPY5     | SRSF protein kinase 3                                                        | <i>SRPK3</i>     | 1.624              | 639274.3714              | 393711.1265              | 0.228                 |
| P62314     | Small nuclear ribonucleoprotein in Sm D1                                     | <i>SNRPD1</i>    | 1.578              | 38773.27086              | 24578.28935              | Not in MOCK           |
| B0AZU3     | cDNA, FLJ79533, highly similar to Bcl-2-associated transcription factor 1    | <i>BCLAF1</i>    | 1.522              | 483677.6498              | 317691.3817              | 0.027                 |
| Q1ZYL5     | Tropomyosin 1 alpha variant 6                                                | <i>TPM1</i>      | 1.488              | 346159.5264              | 232602.3517              | 0.170                 |
| Q9Y2W1     | Thyroid hormone receptor-associated protein 3                                | <i>THRAP3</i>    | 1.384              | 168060.4711              | 121426.4181              | Not in MOCK           |
| A0A7I2V649 | Poly(A) binding protein cytoplasmic 1                                        | <i>PABPC1</i>    | 1.377              | 328409.3726              | 238490.8496              | 0.132                 |
| P42766     | 60S ribosomal protein L35                                                    | <i>RPL35</i>     | 1.352              | 1147868.987              | 849104.6034              | 0.278                 |
| P49207     | 60S ribosomal protein L34                                                    | <i>RPL34</i>     | 1.332              | 260621.3684              | 195646.1547              | Not in MOCK           |
| B4DS01     | cDNA FLJ59402, highly similar to Eukaryotic translation initiation factor 4B | <i>EIF4B</i>     | 1.323              | 95899.90109              | 72485.92044              | Not in MOCK           |

|                |                                                                                |                      |       |                 |             |             |
|----------------|--------------------------------------------------------------------------------|----------------------|-------|-----------------|-------------|-------------|
| Q9Y3U8         | 60S ribosomal protein L36                                                      | <i>RPL36</i>         | 0.774 | 627305.762<br>2 | 810906.0626 | 0.068       |
| K9JA46         | Epididymis luminal secretory protein 52                                        | <i>EL52</i>          | 0.732 | 198949.117      | 271834.7097 | 0.050       |
| F5H5D3         | Tubulin alpha chain                                                            | <i>TUBA1C</i>        | 0.659 | 1013747.95<br>9 | 1539431.448 | 0.148       |
| Q6FHZ0         | Malate dehydrogenase                                                           | <i>MDH2</i>          | 0.650 | 105167.148<br>6 | 161703.4712 | 0.375       |
| Q59GK9         | 60S ribosomal protein L21 (Fragment)                                           | <i>RPL21</i>         | 0.640 | 565550.118<br>2 | 883413.7525 | 0.400       |
| P30050         | 60S ribosomal protein L12                                                      | <i>RPL12</i>         | 0.607 | 230668.161<br>8 | 379716.9421 | Not in MOCK |
| P62979         | Ubiquitin-40S ribosomal protein S27a                                           | <i>RPS27A</i>        | 0.583 | 1333651.21<br>6 | 2288440.529 | 0.173       |
| A0A024R<br>D80 | Heat shock protein 90kDa alpha (Cytosolic), class B member 1, isoform CRA_a    | <i>HSP90AB<br/>1</i> | 0.561 | 1732573.24<br>7 | 3085785.871 | 0.094       |
| A0A0A0<br>MR02 | Voltage dependent anion channel 2 (Fragment)                                   | <i>VDAC2</i>         | 0.344 | 19559.0177<br>2 | 56870.36184 | Not in MOCK |
| B4DIT7         | cDNA FLJ58187, highly similar to Protein-glutamine gamma-glutamyltransferase 2 | <i>TGM2</i>          | 0.323 | 114746.224<br>8 | 354990.6414 | Not in MOCK |

## REFERENCES

1. Josipović, G. *et al.* Antagonistic and synergistic epigenetic modulation using orthologous CRISPR/dCas9-based modular system. *Nucleic Acids Res.* **47**, 9637–9657 (2019).
